# Supplementary material
Source: Springer Nature journal article supplement (https://www.springermedizin.de/resource/supplementary/12943_2009_559_MOESM10_ESM.pdf/9554970)

**DCDC14B**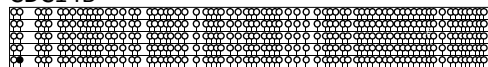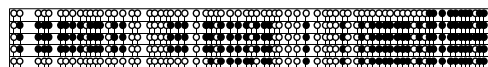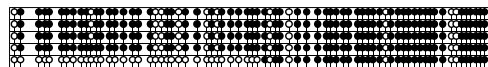**EYA2**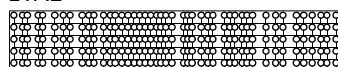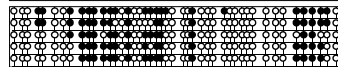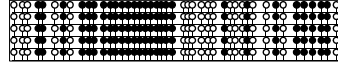**GPR123**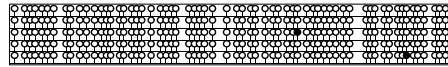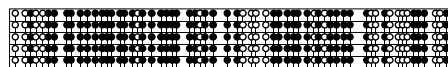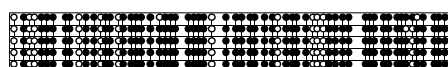**PTGS2**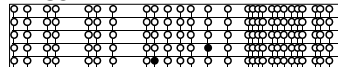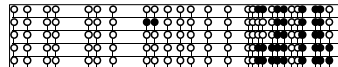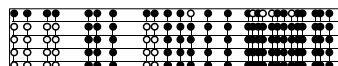**TFAP2C**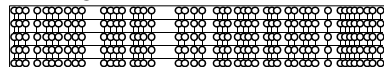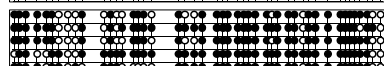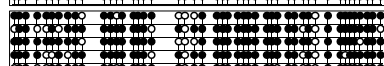**CYP1B1**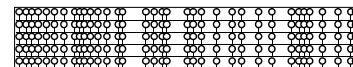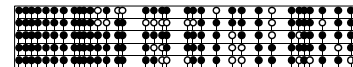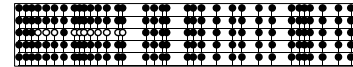**FAT1**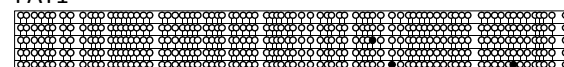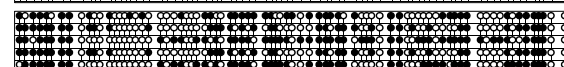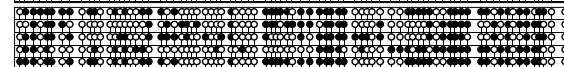**KNDC1**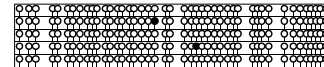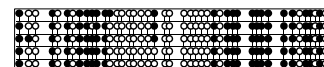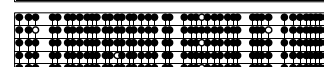**TFAP2A**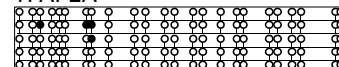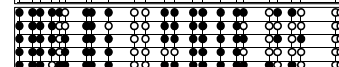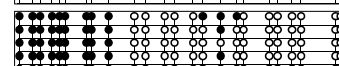**TRPC4**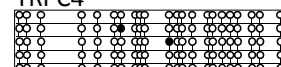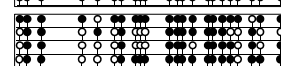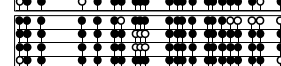

Supplement: MOESM10 [file 9554970]
